# Supplementary material for: TiO2/graphitic carbon nitride nanosheet composite with enhanced sensitivity to atmospheric water
Source: Royal Society of Chemistry journal article supplement (doi:10.1039/d3ra00045a), 2023-01-01
Supplement: d3ra00045a1.pdf [file d3ra00045a1.pdf]

*Electronic Supplementary Information*

**TiO<sub>2</sub>/Graphitic carbon nitride nanosheets composite with enhanced sensitivity to  
atmospheric water**

Tosapol Maluangnont,<sup>a\*</sup> Phieraya Pulphol,<sup>b</sup> Satana Pongampai,<sup>c</sup> Thawanrat Kobkeatthawin,<sup>d</sup>  
Siwaporn Meejoo Smith,<sup>d</sup> and Naratip Vittayakorn<sup>c</sup>

a Electroceramics Research Laboratory, College of Materials Innovation and Technology,  
King Mongkut's Institute of Technology Ladkrabang, Bangkok 10520, Thailand

b Department of Materials Science, Faculty of Science, Srinakharinwirot University, Bangkok  
10110, Thailand

c Advanced Materials Research Unit and Department of Chemistry, School of Science, King  
Mongkut's Institute of Technology Ladkrabang, Bangkok 10520, Thailand

d Center of Sustainable Energy and Green Materials and Department of Chemistry, Faculty  
of Science, Mahidol University, Nakhon Pathom 73170, Thailand

\*corresponding author email: [tosapol.ma@kmitl.ac.th](mailto:tosapol.ma@kmitl.ac.th)

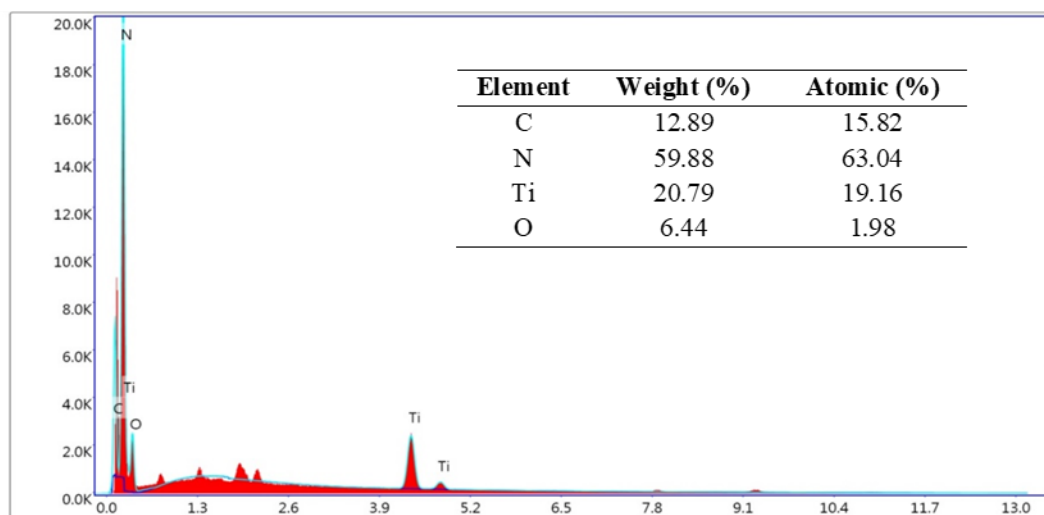

Figure S1 EDX analysis of TiO<sub>2</sub>/CNNS
